# Supplementary material for: Feasibility of balanced steady-state free precession sequence at 1.5T for the evaluation of hepatic steatosis in obese children and adolescents
Source: Springer Nature journal article supplement (doi:10.1007/s00330-018-5344-z), 2018-04-30
Supplement: MOESM1 [file 15728746]

**Electronic Supplementary Material**

**Supplementary Table 1** Characteristics of study participants stratified according to gender

| Variables | Female (N=62) | Male (N=120) | *P* value |
| --- | --- | --- | --- |
| Age (*y*) | 10.25 ± 2.64 | 10.95 ± 2.05 | .072 |
| BMI (*kg/m2*) | 27.93 ± 5.03 | 28.00 ± 3.48 | .910 |
| BMI *Z*-score | 4.49 ± 1.63 | 3.38 ± 1.07 | <.001 |
| Waist circumference (*cm*) | 85.20 ± 12.32 | 89.64 ± 9.35 | .007 |
| ALT (*U/L*) | 25.00 (17.00, 59.50) | 42.00 (23.00, 85.00) | .006 |
| Fasting triglycerides (*mmol/L*) | 1.33 (0.91, 1.91) | 1.24 (0.89, 1.72) | .728 |
| HDL (*mmol/L*) | 1.07 (0.90, 1.28) | 1.17 (0.99, 1.43) | .059 |
| Fasting glucose (*mmol/L*) | 5.40 (5.20, 5.75) | 5.45 (5.20, 5.70) | .802 |
| 120-min glucose (*mmol/L*) | 6.80 (6.25, 7.65) | 7.00 (6.30, 7.68) | .707 |
| HOMA-IR | 4.55 (2.65, 7.53) | 4.44 (3.32, 6.73) | .896 |
| SBP (*mmHg*) | 112.94 ± 13.60 | 119.51 ± 13.88 | .003 |
| DBP *(mmHg*) | 68.55 ± 7.49 | 69.31 ± 8.17 | .541 |
| FF | 6.78 (2.05, 25.97) | 18.20 (8.89, 32.32) | .008 |
| L/S | 0.48 (0.31, 0.53) | 0.38 (0.18, 0.48) | .007 |

**Supplementary Table 1 footnotes:** Data are mean ± SD or median (25th, 75th percentiles). *P* values correspond to Student's *t*-test or Mann-Whitney *U* tests.

*BMI* Body mass index (calculated as weight in kg/height in m2), *ALT* Alanine aminotransferase, *HDL* High-density lipoprotein, *HOMA-IR* Homeostasis model assessment of insulin resistance, *SBP* Systolic blood pressure, *DBP* Diastolic blood pressure, *FF* Fat fraction, *L/S* Liver/spleen.
